# Supplementary material for: MutComFocal: an integrative approach to identifying recurrent and focal genomic alterations in tumor samples
Source: PubMed Central journal article supplement (PMC3637169; doi:10.1186/1752-0509-7-25), 2013-03-25

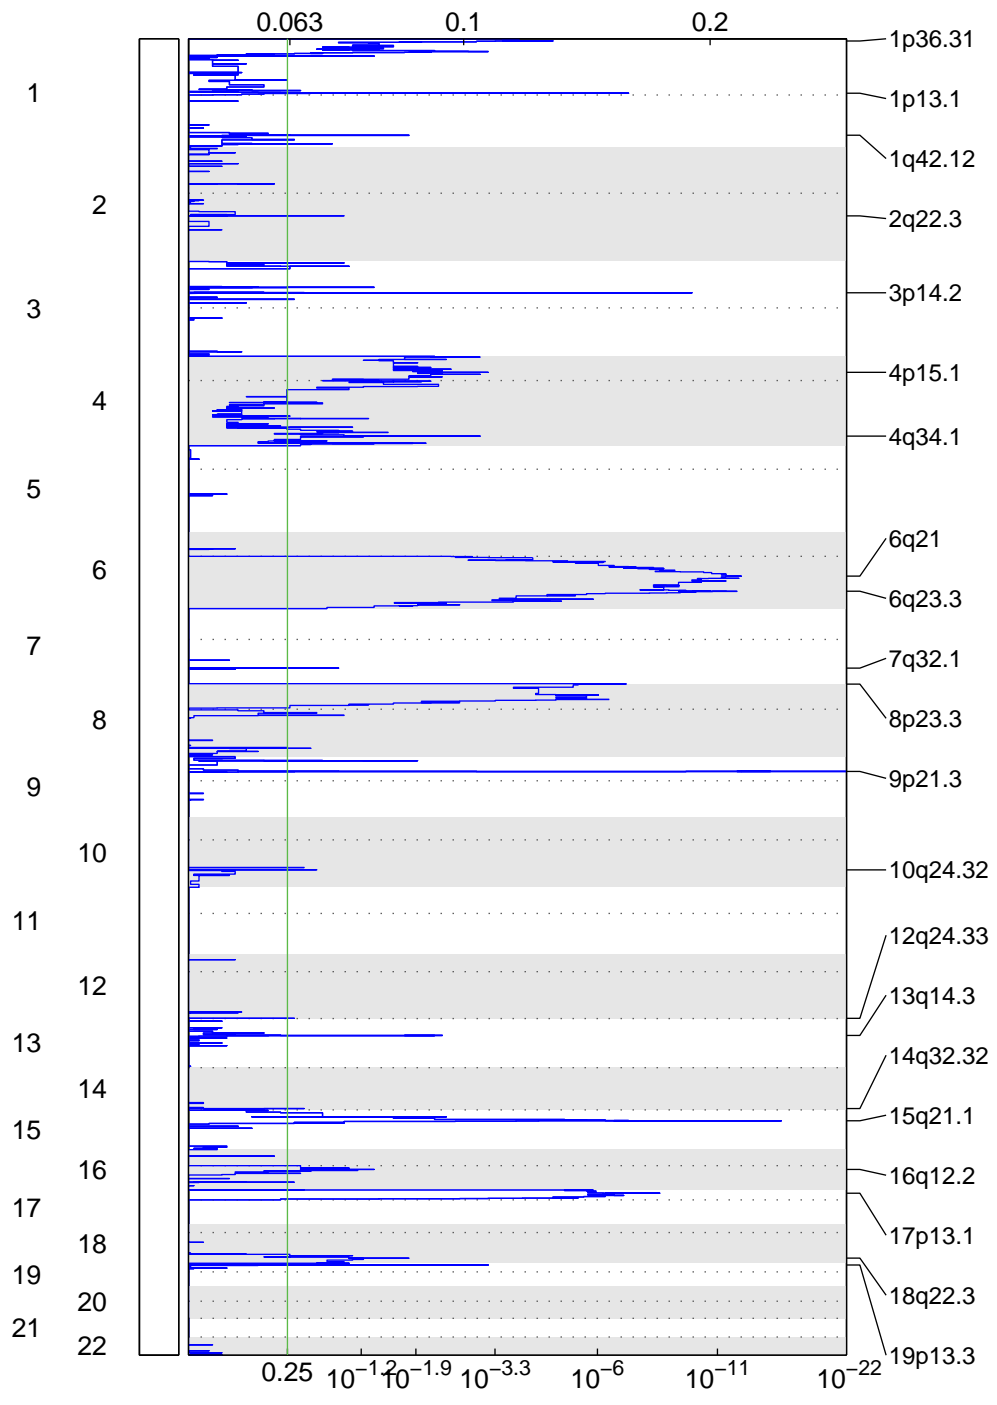

Supplement: 1752-0509-7-25-S6.pdf [file 1752-0509-7-25-S6.pdf]
